# Supplementary material for: Impact of Type 2 Diabetes Mellitus on the Incidence and Outcomes of COVID-19 Needing Hospital Admission According to Sex: Retrospective Cohort Study Using Hospital Discharge Data in Spain, Year 2020
Source: MDPI journal article supplement (doi:10.3390/jcm11092654), 2022-05-09
Supplement: s1 [file s1]

**Supplemental Table S1.** ICD-10 codes for diagnosis and therapeutic procedures used in this investigation.

|                                                                                                   | Description                                                     | ICD-10 codes                                   |
|---------------------------------------------------------------------------------------------------|-----------------------------------------------------------------|------------------------------------------------|
| Codes when a coronavirus has been identified                                                      | Coronavirus infection, unspecified                              | B34.2                                          |
|                                                                                                   | Other coronavirus as the cause of diseases classified elsewhere | B97.29                                         |
|                                                                                                   | COVID 19                                                        | U07.1                                          |
|                                                                                                   | Viral pneumonia, unspecified                                    | J12.9                                          |
| Beside any of the three codes for a coronavirus, one or more of these conditions must be codified | Other viral pneumonia                                           | J12.89                                         |
|                                                                                                   | Acute bronchitis due to other specified organisms               | J20.8                                          |
|                                                                                                   | Acute bronchitis, unspecified                                   | J20.9                                          |
|                                                                                                   | Unspecified acute lower respiratory infection                   | J22                                            |
|                                                                                                   | Other specified respiratory disorders                           | J98.8                                          |
|                                                                                                   | Acute respiratory distress syndrome                             | J80                                            |
|                                                                                                   | Severe sepsis without septic shock                              | R65.20                                         |
|                                                                                                   | Severe sepsis with septic shock                                 | R65.21                                         |
| Type 2 diabetes *                                                                                 |                                                                 | E11.xxx                                        |
| Type 1 diabetes (exclusion)                                                                       |                                                                 | E10.xxx                                        |
| Obesity                                                                                           |                                                                 | E66.09, E66.1, E66.2, E66.01E66.3, E66.8 E66.9 |
| Non-invasive mechanical ventilation                                                               |                                                                 | 5A09357, 5A09457, 5A09557                      |
| Invasive mechanical ventilation                                                                   |                                                                 | 5A1945Z, 5A1955Z, 5A1935Z                      |

\*Each discharge diagnosis has a “Present on Admission (POA)” indicator assigned according to the ICD-10-CM Official Guidelines for Coding and Reporting (<https://icdlist.com/icd-10/guidelines/>). The reporting options and definitions for POA are “Y” (present at admission); “N” (not present at admission); “U” (lack documentation to determine presence at admission); “W” (provider is unable to clinically determine if the condition was present); and unreported/not used. Only T2DM patients with “Y” were included in the study population.

The ICD 10 codes for conditions included in the Charlson Comorbidity Index can be found in references

Sundararajan V, Henderson T, Perry C, Muggivan A, Quan H, Ghali WA. New ICD-10 version of the Charlson comorbidity index predicted in-hospital mortality. J. Clin. Epidemiol 2004;57:1288–94. doi: 10.1016/j.jclinepi.2004.03.012.

Quan H, Sundararajan V, Halfon P, Fong A, Burnand B, Luthi JC, et al. Coding algorithms for defining comorbidities in ICD-9-CM and ICD-10 administrative data. Med Care. 2005;43:1130-9. doi: 10.1097/01.mlr.0000182534.19832.83.
